# Supplementary material for: Cytokine Profiles Differentiate Symptomatic from Asymptomatic PTSD in Service Members and Veterans with Chronic Traumatic Brain Injury
Source: MDPI journal article supplement (doi:10.3390/biomedicines10123289), 2022-12-19
Supplement: s1 [file s1]

**Supplemental Table S1. Group differences in cytokine concentrations**

| <b>Biomarker<br/>(pg/mL)</b> | <b>PTSD symptomatic, N = 62<sup>1</sup></b> | <b>PTSD asymptomatic, N = 61<sup>1</sup></b> | <b>p-value<sup>2</sup></b> | <b>Cohen's d</b> |
|------------------------------|---------------------------------------------|----------------------------------------------|----------------------------|------------------|
| CRP                          | 187,726.228 (589351.477, 2804246.183)       | 905,713.190 (553516.757, 1940287.221)        | 0.093                      | 0.44             |
| IL1RA                        | 197.514 (127.337, 290.581)                  | 161.455 (124.913, 283.968)                   | 0.427                      | 0.26             |
| VEGF                         | 40.574 (27.980, 68.262)                     | 45.579 (29.332, 68.159)                      | 0.614                      | 0.01             |
| IL6                          | 0.206 (0.149, 0.298)                        | 0.134 (0.095, 0.227)                         | <0.001*                    | 0.50             |
| IL8                          | 2.410 (1.618, 3.284)                        | 1.592 (1.235, 2.129)                         | <0.001*                    | 0.84             |
| IL10                         | 0.120 (0.084, 0.181)                        | 0.096 (0.062, 0.134)                         | 0.026*                     | 0.55             |
| TNFα                         | 0.784 (0.354, 1.037)                        | 0.265 (0.223, 0.358)                         | <0.001*                    | 1.34             |
| ptau                         | 1.993 (1.555, 2.800)                        | 2.063 (1.504, 3.153)                         | 0.398                      | 0.35             |

<sup>1</sup> Data are represented as median (IQR)

<sup>2</sup> Mann Whitney U test, p\* < 0.05

Abbreviations: CRP, C-reactive protein; IL1RA, interleukin 1 receptor agonist; VEGF, vascular endothelial growth factor; IL6, interleukin 6; IL8, interleukin 8; IL10, interleukin 10; TNFα, tumor necrosis factor alpha; ptau, phosphorylated tau
